# Supplementary material for: Zr-gallic acid based metal organic compound as adsorbent for extraction of uranium( vi ) from nitrate solution: adsorption behaviors and mechanisms
Source: Royal Society of Chemistry journal article supplement (doi:10.1039/d5ra05880e), 2026-01-01
Supplement: d5ra05880e1.pdf [file d5ra05880e1.pdf]

## **Zr-Gallic acid based metal organic compound as adsorbent for extraction of Uranium (VI) from Nitrate solution: Adsorption behaviors and mechanisms**

**Ahmed M. Masoud**

*Nuclear Materials Authority, P.O. Box 530, El Maddi, Cairo, Egypt*

**Corresponding author:** [chemmaso010@hotmail.com](mailto:chemmaso010@hotmail.com)

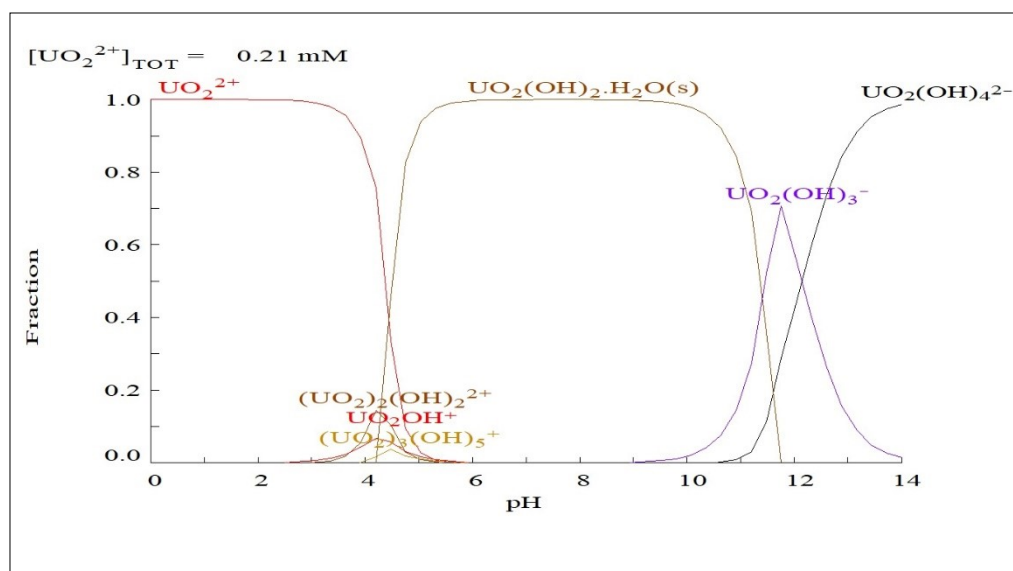

**Figure S1:** *U(VI) speciation as a function of solution pH, calculated using Hydra-MEDUSA equilibrium calculation program [1].*

- 1) Hussein AEM, Taha MH (2013) Uranium removal from nitric acid raffinate solution by solvent immobilized PVC cement. *J Radioanal Nucl Chem* 295:709–715. <https://doi.org/10.1007/S10967-012-2158-3/TABLES/2>

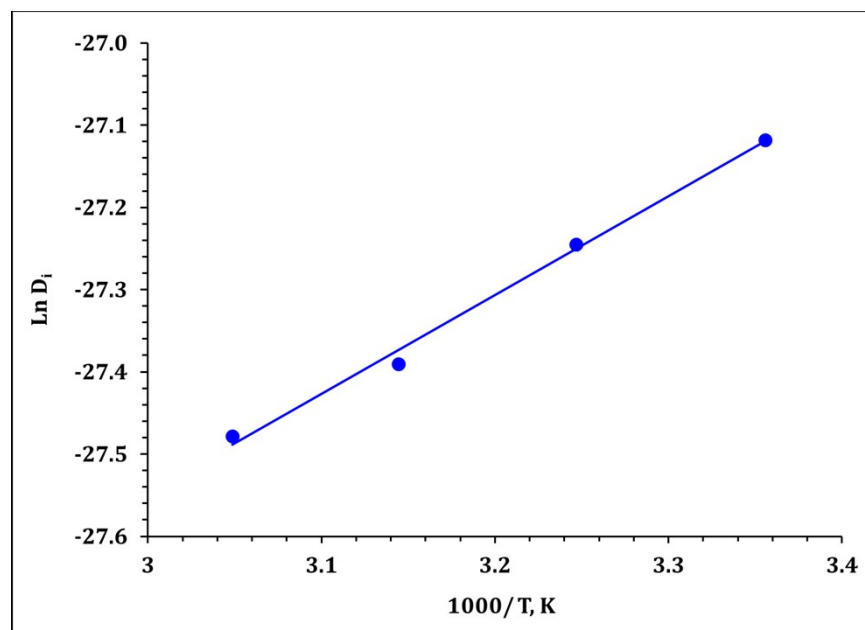

**Figure S2:** Arrhenius plot for  $U(VI)$  sorption onto prepared composite

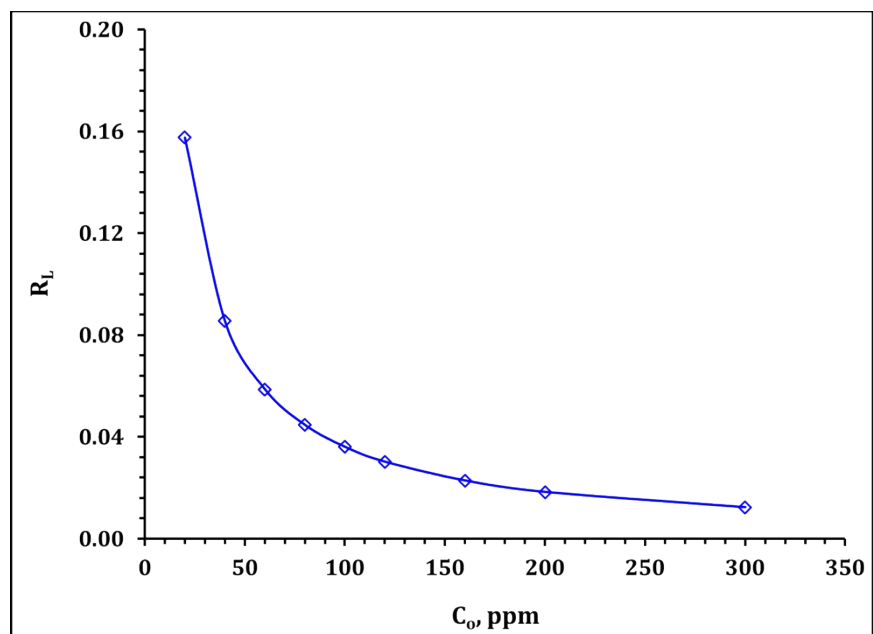

**Figure S3:** Separation factor  $R_L$  of U(VI) adsorption process.

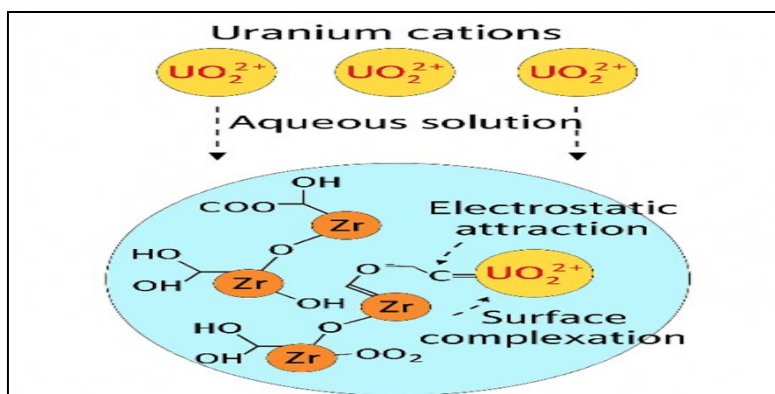

**Figure S4.** Schematic representation of the proposed adsorption mechanism of U(VI) onto Zr-GA

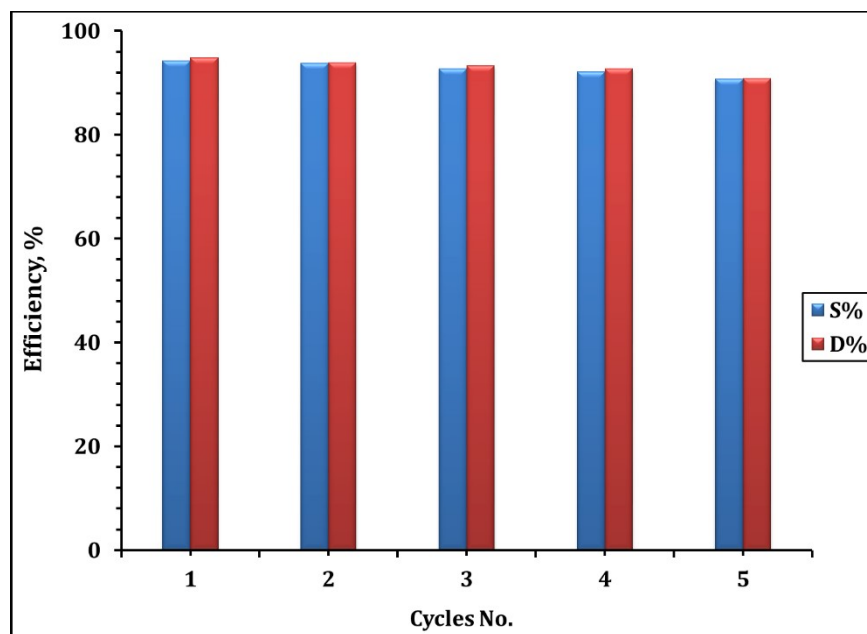

**Figure S5:** *Sorption/ desorption cycles for uranium capture process.*

**Table S1:** Kinetic, isotherm, and thermodynamics equations for U(VI) adsorption process [1-8].

| Kinetics                             | Equations                                                                                                                                  |
|--------------------------------------|--------------------------------------------------------------------------------------------------------------------------------------------|
| Pseudo-first-order                   | $q_t = q_1(1 - e^{-k_1 t})$                                                                                                                |
| Pseudo-second-order                  | $q_t = \frac{1}{\left(1 \mid k_2 q_2^2\right) + (t \mid q_2)}$                                                                             |
| Intra-particle diffusion model (IPD) | $q_t = K_{id} t^{0.5} + C_i$                                                                                                               |
| Boyd model                           | $Bt = -0.4977 - \ln(1 - F)$                                                                                                                |
| Isotherms                            | Equations                                                                                                                                  |
| Langmuir model                       | $q_e = \frac{q_m k_L C_e}{1 + k_L C_e}$                                                                                                    |
| Freundlich model                     | $q_e = K_F C_e^{1/n_F}$                                                                                                                    |
| Sips model                           | $q_e = \frac{q_s (k_s C_e)^{m_s}}{1 + (k_s C_e)^{m_s}}$                                                                                    |
| Thermodynamics                       | Equations                                                                                                                                  |
|                                      | $\log K_c = -\frac{\Delta H^0}{2.303 R} \times \frac{1}{T} + C$ $-\Delta G^0 = 2.303 RT \log K_c$ $\Delta G^0 = \Delta H^0 - T \Delta S^0$ |
| Fitting                              | Equations                                                                                                                                  |
| Coordination coefficient ( $R^2$ )   | $R^2 = 1 - \frac{\sum_1^n (q_{exp} - q_{pred})^2}{\sum_1^n (q_{exp} - q_{exp}^-)^2}$                                                       |

$q_e$  (mg g<sup>-1</sup>) is the equilibrium concentration of U(VI) species, and  $q_t$  (mg g<sup>-1</sup>) is the adsorbed amount of U(VI) species ions after time  $t$  (min),  $C_e$  (mg L<sup>-1</sup>) is equilibrium concentration of U(VI) species.  $k_1$  (min<sup>-1</sup>) and  $k_2$  (min<sup>-1</sup>) are the rate constants for the pseudo first and second order, respectively.  $K_{id}$  (mg/g. min<sup>0.5</sup>) is a rate constant, and  $C$  is the thickness of the boundary layer.  $F$  is

the ratio of the sorbed quantity at time  $t$  and that sorbed at equilibrium;  $B$  is the time constant and it equals  $\pi^2 D_i / r_o^2$  [4];  $D_i$  is the effective diffusion coefficient of metal ions;  $r_o$  is the radius of the solid particles; and  $n$  is an integer.  $q_m$  and  $q_s$  are the maximum sorption capacity (mg. g<sup>-1</sup>) of Langmuir and Sips models.  $k_L$  (L. mg<sup>-1</sup>),  $K_F$  (L/ mg), and  $K_S$  (L/ mg) are represent the constants of Langmuir, Freundlich, and Sips models.  $n$  refer to the sorption intensity,  $q_s$  is the theoretical isotherm saturation capacity (mg/g).  $K_C$  is a non-dimensional equilibrium constant and it equals  $K_d \times 1000 \times \rho$  [5];  $T$  is the temperature (K),  $R$  is the universal gas constant (8.314 J mol<sup>-1</sup>. K<sup>-1</sup>),  $\rho$  is solution density g/ L, and  $C$  is a constant.  $R^2$  is the coordination coefficient, the number of test points is  $n$ , the experimental equilibrium capacity is  $q_{exp}$  (mg g<sup>-1</sup>), while the predicted capacity is  $q_{pred}$  (mg g<sup>-1</sup>).

**Table S2:** Surface charges and mean particle sizes of Zr-GA before and after adsorption process

| <i>Analysis</i>           | <i>Before</i> | <i>After</i> |
|---------------------------|---------------|--------------|
| <i>DLS analysis, nm</i>   | 549.5         | 1116.1       |
| <i>Zeta potential, mV</i> | -46.69        | -26.49       |

**Table S3:** The values of Morris-Weber model parameters.

|                               |                                                  | 25 °C | 35 °C | 45 °C | 55 °C |
|-------------------------------|--------------------------------------------------|-------|-------|-------|-------|
| <b>Weber and Morris model</b> | <b><math>k_i</math> (mg/g min<sup>1/2</sup>)</b> | 1.06  | 0.88  | 0.67  | 0.44  |
|                               | <b><math>C</math></b>                            | 20.5  | 13.5  | 10.4  | 5.3   |
|                               | <b><math>R^2</math></b>                          | 0.98  | 0.97  | 0.98  | 0.96  |



## **References:**

- 1) Hu, Q., Pang, S. and Wang, D., 2022. In-depth insights into mathematical characteristics, selection criteria and common mistakes of adsorption kinetic models: A critical review. *Separation & Purification Reviews*, 51(3), pp.281-299.
- 2) González-López, M.E., Laureano-Anzaldo, C.M., Pérez-Fonseca, A.A., Arellano, M. and Robledo-Ortíz, J.R., 2022. A critical overview of adsorption models linearization: methodological and statistical inconsistencies. *Separation & Purification Reviews*, 51(3), pp.358-372.
- 3) Tho, P.T., Van, H.T., Nguyen, L.H., Hoang, T.K., Tran, T.N.H., Nguyen, T.T., Nguyen, T.B.H., Le Sy, H., Tran, Q.B., Sadeghzadeh, S.M. and Asadpour, R., 2021. Enhanced simultaneous adsorption of As (iii), Cd (ii), Pb (ii) and Cr (vi) ions from aqueous solution using cassava root husk-derived biochar loaded with ZnO nanoparticles. *RSC advances*, 11(31), pp.18881-18897.
- 4) Hassan, H.S., El-Kamash, A.M. and Ibrahim, H.A.S., 2019. Evaluation of hydroxyapatite/poly (acrylamide-acrylic acid) for sorptive removal of strontium ions from aqueous solution. *Environmental Science and Pollution Research*, 26, pp.25641-25655.
- 5) Chen, X., Hossain, M.F., Duan, C., Lu, J., Tsang, Y.F., Islam, M.S. and Zhou, Y., 2022. Isotherm models for adsorption of heavy metals from water-a review. *Chemosphere*, 307, p.135545.
- 6) Majd, M.M., Kordzadeh-Kermani, V., Ghalandari, V., Askari, A. and Sillanpää, M., 2022. Adsorption isotherm models: A comprehensive and systematic review (2010–2020). *Science of The Total Environment*, 812, p.151334.
- 7) Taha, M.H., 2021. Sorption of U (VI), Mn (II), Cu (II), Zn (II), and Cd (II) from multi-component phosphoric acid solutions using MARATHON C resin. *Environmental Science and Pollution Research*, 28(10), pp.12475-12489.
- 8) Ebelegi, A.N., Ayawei, N. and Wankasi, D., 2020. Interpretation of adsorption thermodynamics and kinetics. *Open Journal of Physical Chemistry*, 10(3), pp.166-182.
